# Supplementary figures and images for: Spectroscopic signatures of HHe2+ and HHe3+
Source: Royal Society of Chemistry journal article supplement (doi:10.1039/d0cp04649c), 2020-01-01

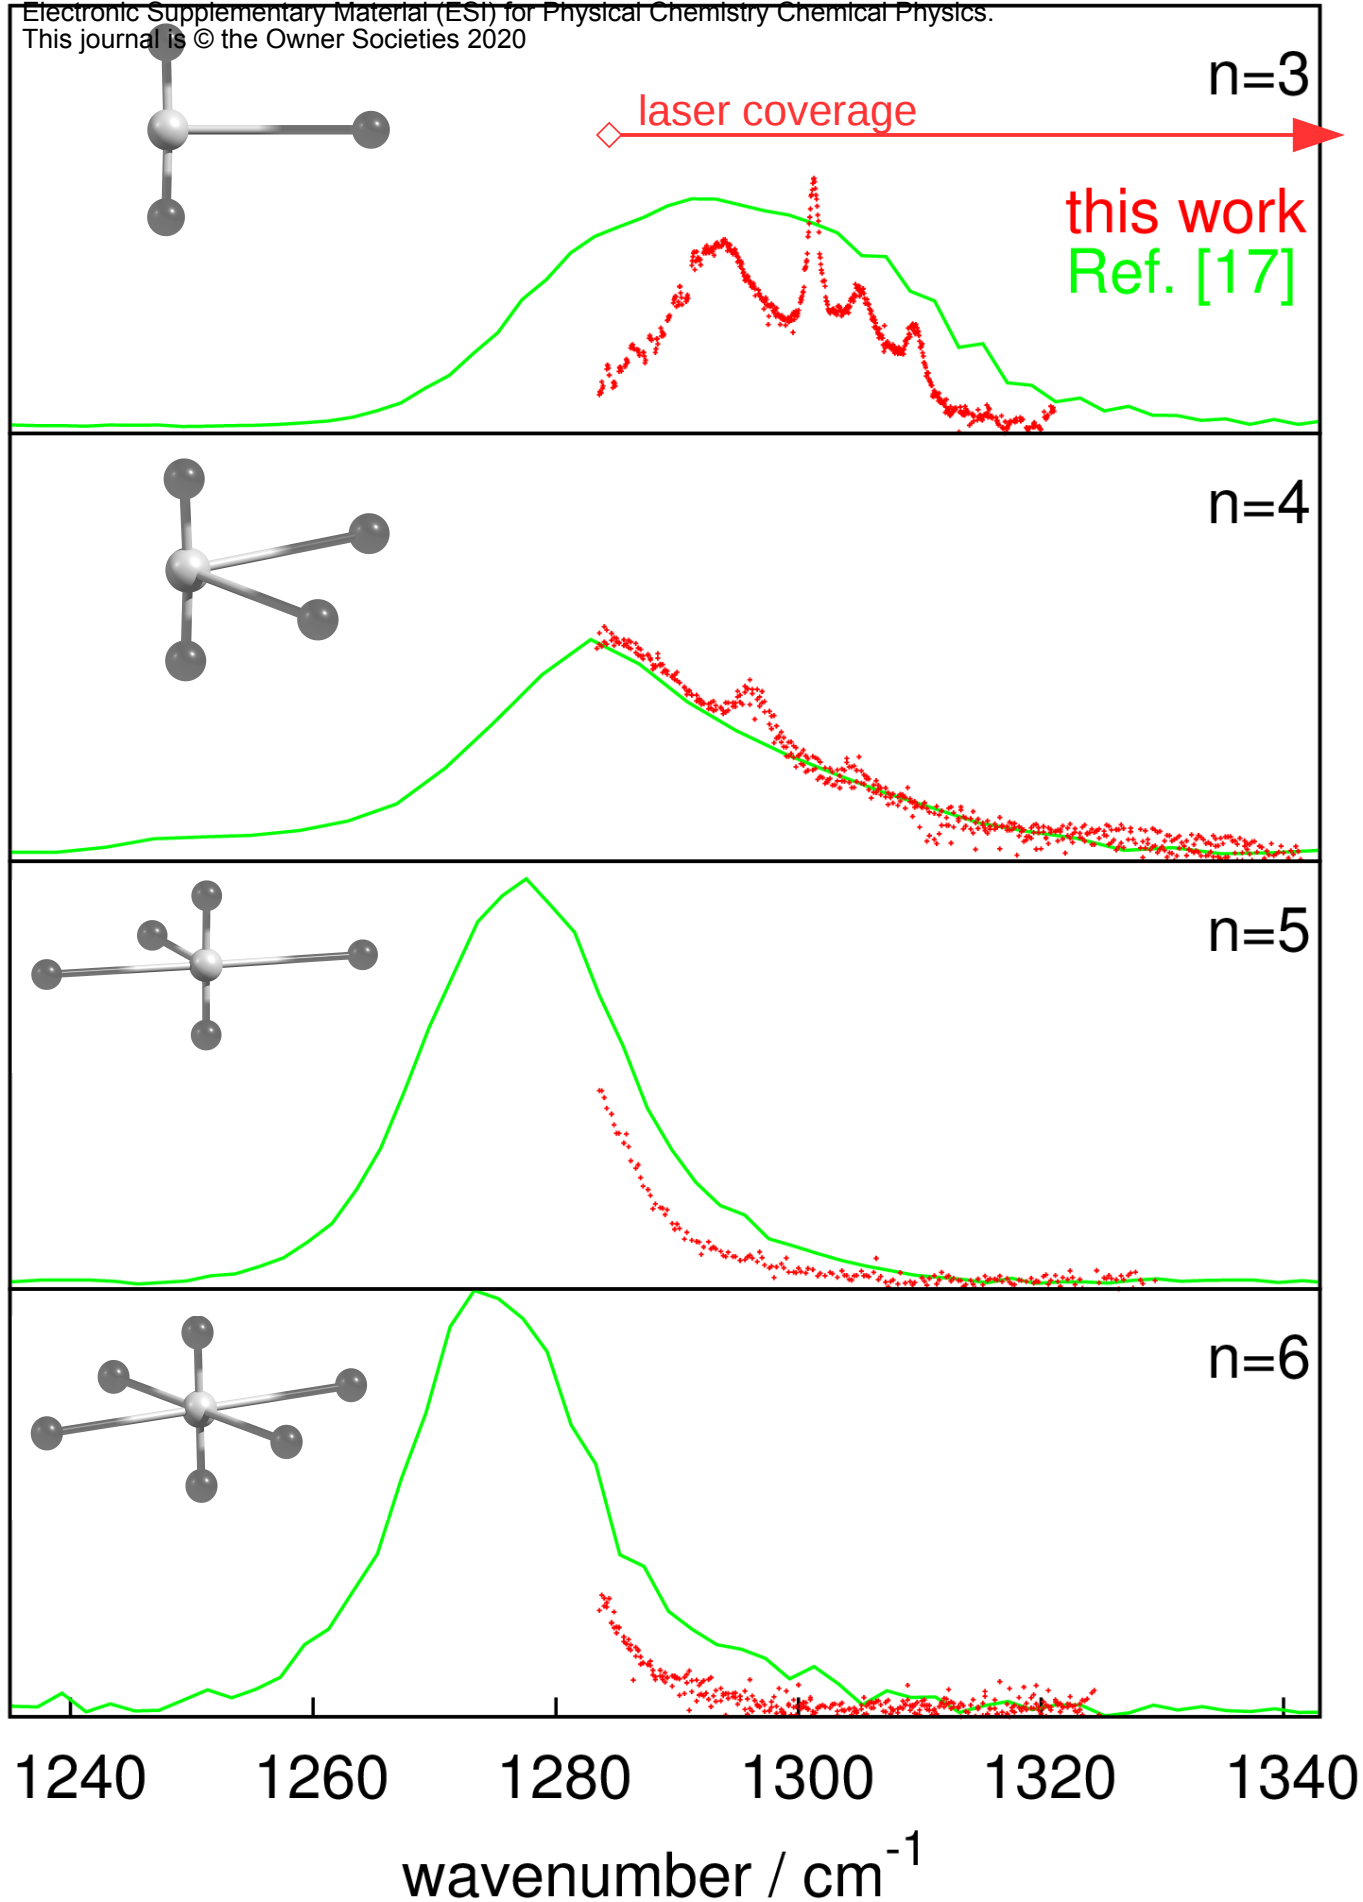

Supplement: d0cp04649c1.pdf [file d0cp04649c1.pdf]
